# Supplementary material for: Characterizing the role of miRNAs within gene regulatory networks using integrative genomics techniques
Source: PubMed Central journal article supplement — Mol Syst Biol. 2011 May 24;7:490. doi: 10.1038/msb.2011.23 (PMC3130556; doi:10.1038/msb.2011.23), 2011-05-24
Supplement: msb201123-s6.pdf [file msb201123-s6.pdf]

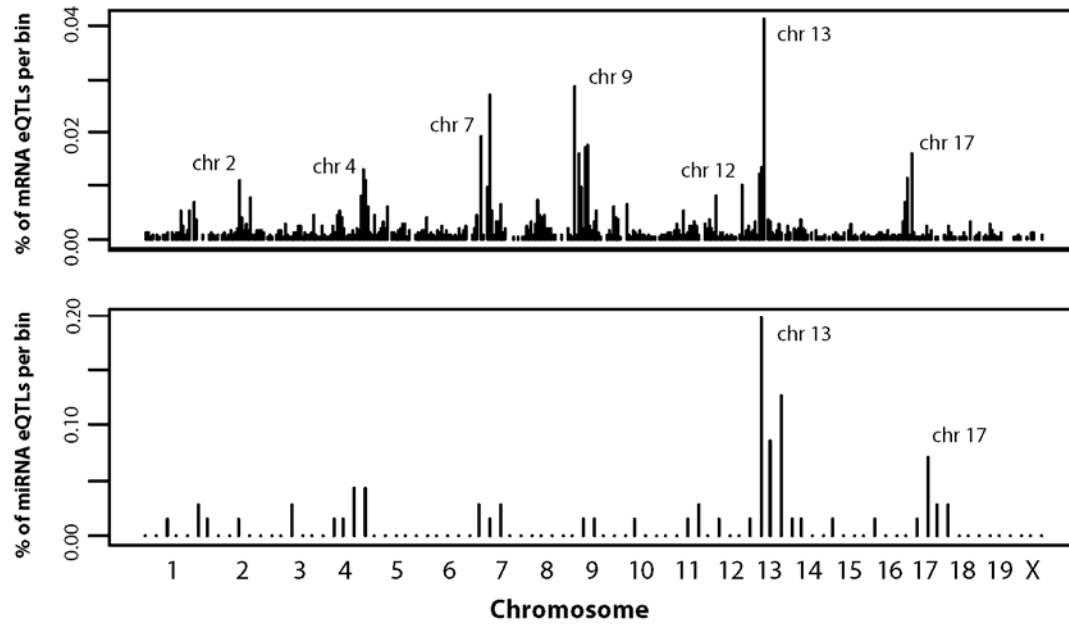

**Supplementary figure 1.** Distribution of eQTLs in 2 and 20 cM bins for mRNA and miRNA eQTLs, respectively, across the genome at a 10% FDR threshold. Top panel illustrates all mRNA eQTLs with LOD scores > 4.3 while the bottom panel illustrates all miRNA eQTLs with LOD scores > 3.2

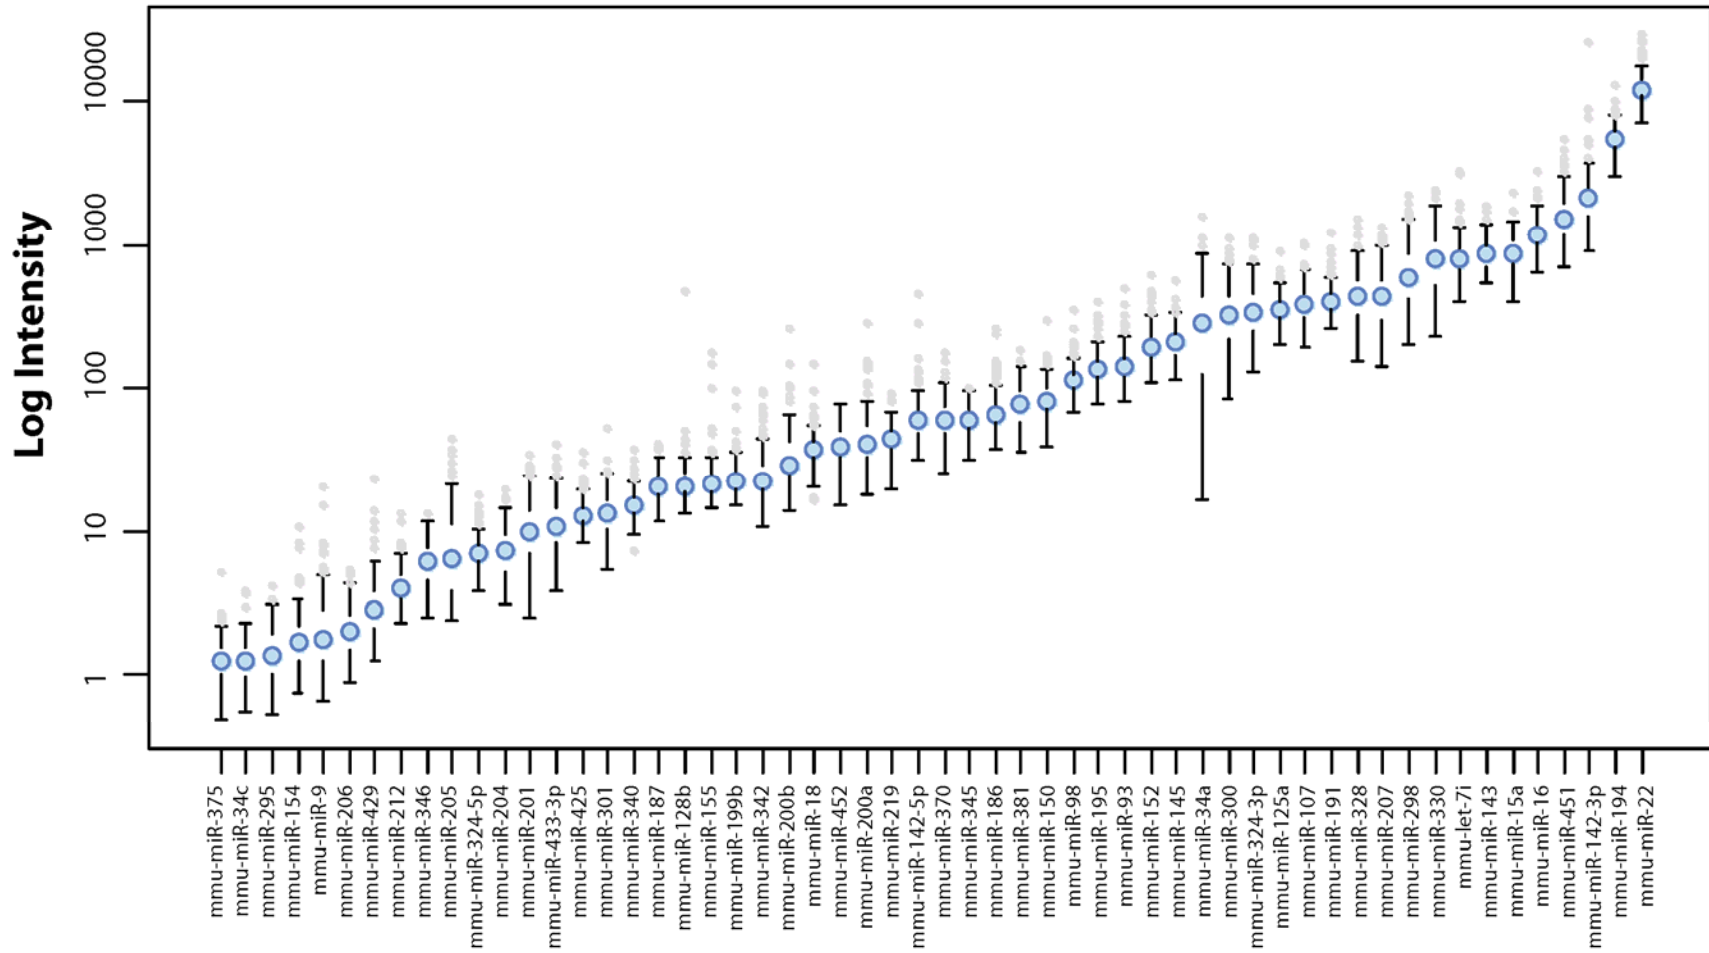

Supplementary figure 2. Intensity measurements for miRNAs with detectable eQTLs (FDR < 10%)

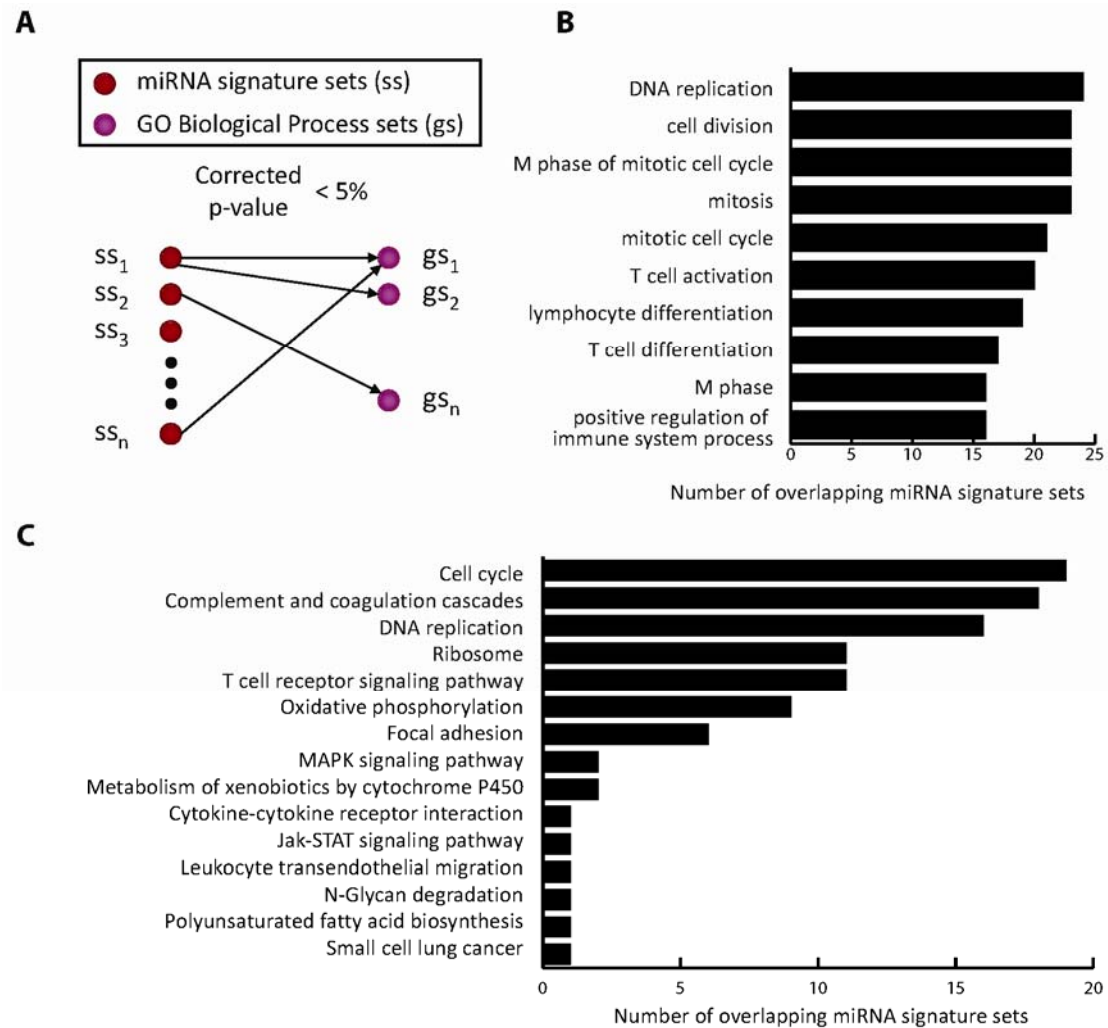

**Supplementary figure 3.** Summary of miRNA-mRNA correlation analysis. A. Illustration of the enrichment analysis. Fisher's exact test statistics for all pairwise comparisons between each set of miRNA signature sets and each category in GO Biological Process are computed. P-values are corrected for multiple hypothesis testing using a Bonferroni's correction. The same analysis is repeated using sets in KEGG Pathways and Body Atlas Tissue Enrichment databases. Significant enrichment between the sets are defined as those with a corrected p-value of less than 0.05. B. Histogram showing the top 10 categories for GO Biological Process category in terms of number of enriched miRNAs signature sets. C. Histogram showing the number of enriched miRNA signature sets in each KEGG pathway category.

### Cell cycle

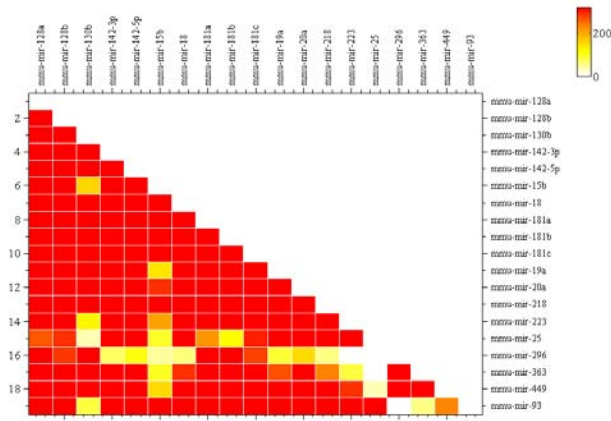

### Complement & Coagulation pathway

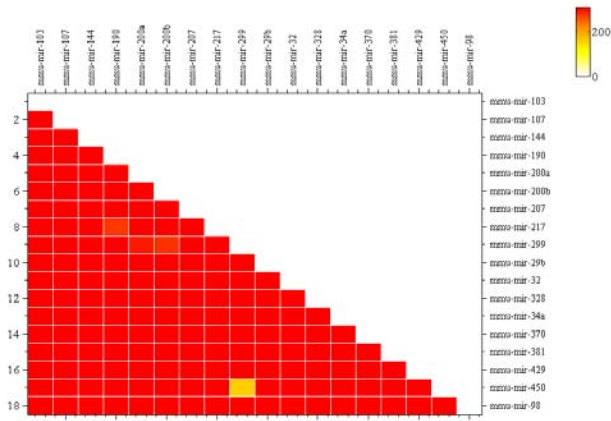

### DNA replication

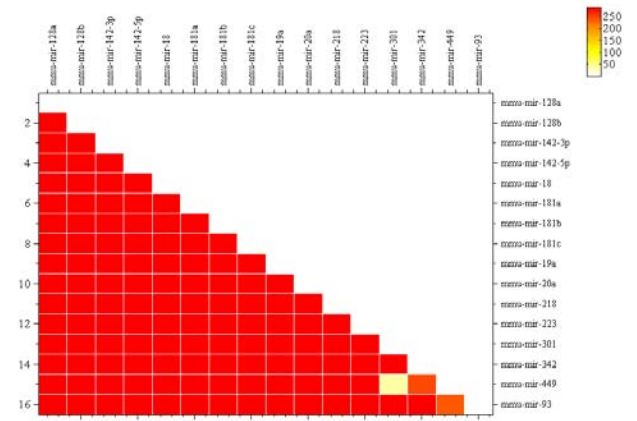

### Ribosome

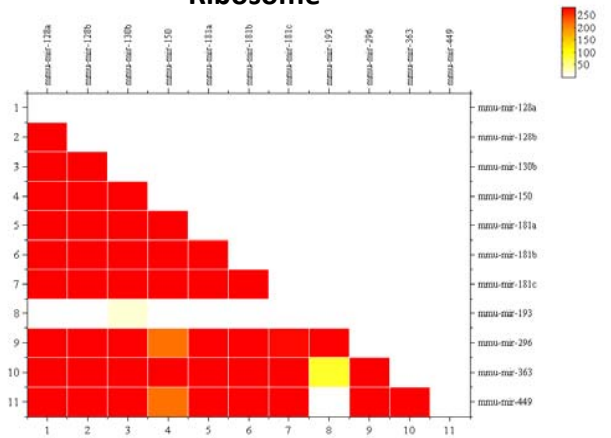

### T-cell signaling pathway

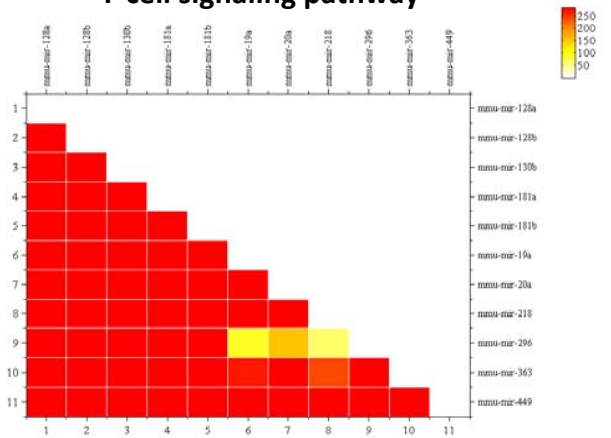

### Oxidative phosphorylation

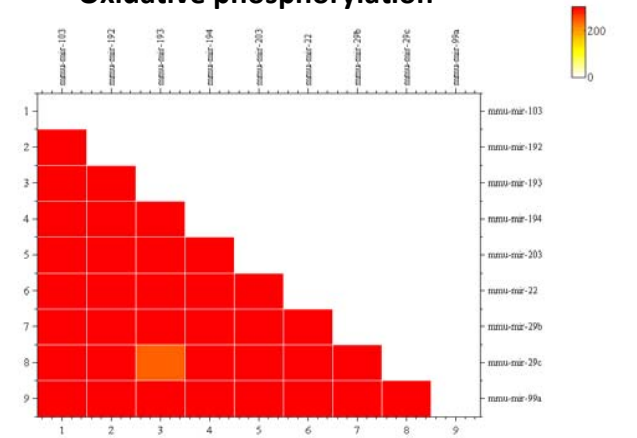

### Focal adhesion

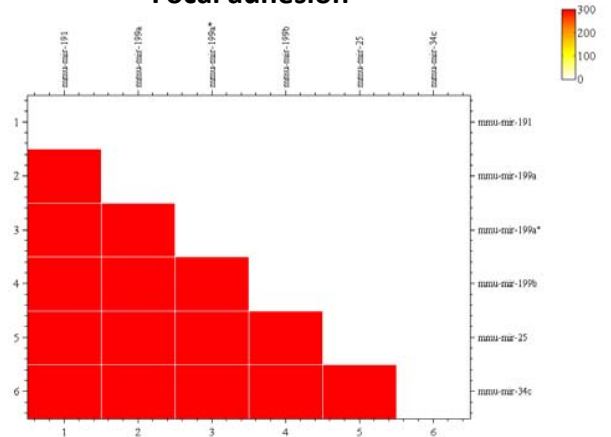

**Supplementary figure 4.** Fisher exact test for significant association between two miRNA signature set associated with the same KEGG pathway.  $-\log_{10}$  p-values were used to build the heatmap.

**Supplementary Table 2.** Top 10 results (ordered by enrichment fold-change) for GO Biological Process Enrichment, KEGG Pathways Enrichment

| MicroRNA                     | Category                                     | miRNA signature set size | GO set size | Overlap (Enrichment) <sup>a</sup> | Nominal p-value <sup>b</sup> | Corrected p-value <sup>b</sup> |
|------------------------------|----------------------------------------------|--------------------------|-------------|-----------------------------------|------------------------------|--------------------------------|
| <i>GO Biological Process</i> |                                              |                          |             |                                   |                              |                                |
| mmu-mir-92                   | RNA splicing                                 | 431                      | 265         | 32(4.43)                          | 1.55E-12                     | 1.02E-08                       |
| mmu-mir-92                   | DNA replication                              | 431                      | 216         | 25(4.25)                          | 1.12E-09                     | 7.35E-06                       |
| mmu-mir-130b                 | chromosome segregation                       | 1434                     | 81          | 29(3.95)                          | 3.45E-11                     | 2.26E-07                       |
| mmu-mir-449                  | spindle organization and biogenesis          | 2506                     | 32          | 20(3.94)                          | 3.03E-09                     | 1.98E-05                       |
| mmu-mir-192                  | oxidative phosphorylation                    | 1334                     | 60          | 19(3.75)                          | 2.48E-07                     | 1.63E-03                       |
| mmu-mir-20a                  | DNA replication initiation                   | 2962                     | 30          | 21(3.74)                          | 1.23E-09                     | 8.08E-06                       |
| mmu-mir-130b                 | DNA-dependent DNA replication                | 1434                     | 77          | 26(3.72)                          | 1.54E-09                     | 1.01E-05                       |
| mmu-mir-449                  | negative regulation of DNA metabolic process | 2506                     | 33          | 19(3.63)                          | 5.08E-08                     | 3.33E-04                       |
| mmu-mir-92                   | chromatin modification                       | 431                      | 266         | 26(3.59)                          | 1.89E-08                     | 1.24E-04                       |
| mmu-mir-92                   | mRNA metabolic process                       | 431                      | 318         | 31(3.58)                          | 8.38E-10                     | 5.49E-06                       |
| <i>KEGG Pathways</i>         |                                              |                          |             |                                   |                              |                                |
| mmu-mir-150                  | Ribosome                                     | 543                      | 75          | 48(4.75)                          | 1.35E-24                     | 2.68E-22                       |
| mmu-mir-19a                  | DNA replication                              | 618                      | 33          | 23(4.55)                          | 2.58E-12                     | 5.10E-10                       |
| mmu-mir-15b                  | Cell cycle                                   | 192                      | 108         | 23(4.47)                          | 5.56E-10                     | 1.10E-07                       |
| mmu-mir-296                  | Ribosome                                     | 470                      | 75          | 39(4.46)                          | 5.49E-18                     | 1.09E-15                       |
| mmu-mir-449                  | DNA replication                              | 703                      | 33          | 25(4.35)                          | 2.53E-13                     | 5.02E-11                       |
| mmu-mir-193                  | Ribosome                                     | 411                      | 75          | 30(3.93)                          | 6.63E-12                     | 1.31E-09                       |
| mmu-mir-299                  | Complement and coagulation cascades          | 344                      | 69          | 23(3.91)                          | 3.93E-09                     | 7.79E-07                       |
| mmu-mir-363                  | Ribosome                                     | 599                      | 75          | 43(3.86)                          | 9.28E-18                     | 1.84E-15                       |
| mmu-mir-29c                  | Oxidative phosphorylation                    | 312                      | 119         | 34(3.69)                          | 4.85E-12                     | 9.59E-10                       |
| mmu-mir-20a                  | DNA replication                              | 785                      | 33          | 23(3.58)                          | 4.29E-10                     | 8.50E-08                       |

<sup>a</sup>The number in the parentheses is the fold-change enrichment. The fold-change enrichment is defined to be the observed overlap divided by the observed overlap.

<sup>b</sup>The nominal p-value represents the Fisher's exact test statistics while the corrected p-value represents the Bonferroni-corrected p-value (nominal p-value multiplied by the number of sets searched).

**Supplementary Table 3.** Top 10 results (ordered by enrichment fold-change) for miRNA signature sets (significant correlation and at least 1 hexamer seed)

| MicroRNA                     | seed (6mer) | Category                                                              | miRNA signature set size | GO set size | Overlap (Enrichment) <sup>a</sup> | Nominal p-value <sup>b</sup> | Corrected p-value <sup>b</sup> |
|------------------------------|-------------|-----------------------------------------------------------------------|--------------------------|-------------|-----------------------------------|------------------------------|--------------------------------|
| <i>GO Biological Process</i> |             |                                                                       |                          |             |                                   |                              |                                |
| mmu-mir-92                   | GTGCAA      | chromosome organization and biogenesis                                | 168                      | 494         | 25(4.76)                          | 8.57E-11                     | 5.61E-07                       |
| mmu-mir-150                  | TGGGAG      | immune response-regulating cell surface receptor signaling pathway    | 912                      | 87          | 18(3.59)                          | 1.86E-06                     | 1.22E-02                       |
| mmu-mir-150                  | TGGGAG      | immune response-regulating signal transduction                        | 912                      | 111         | 22(3.44)                          | 3.02E-07                     | 1.98E-03                       |
| mmu-mir-181a                 | GAATGT      | regulation of cell-cell adhesion                                      | 2571                     | 31          | 17(3.37)                          | 9.76E-07                     | 6.39E-03                       |
| mmu-mir-150                  | TGGGAG      | immune response-activating signal transduction                        | 912                      | 108         | 21(3.37)                          | 7.79E-07                     | 5.10E-03                       |
| mmu-mir-449                  | CACTGC      | regulation of DNA metabolic process                                   | 1255                     | 86          | 23(3.37)                          | 1.47E-07                     | 9.60E-04                       |
| mmu-mir-199a                 | ACTGGG      | positive regulation of cellular component organization and biogenesis | 758                      | 134         | 21(3.27)                          | 1.55E-06                     | 1.02E-02                       |
| mmu-mir-130b                 | TGCACT      | DNA replication                                                       | 608                      | 216         | 27(3.25)                          | 6.87E-08                     | 4.50E-04                       |
| mmu-mir-34c                  | CACTGC      | extracellular structure organization and biogenesis                   | 491                      | 248         | 25(3.25)                          | 2.38E-07                     | 1.56E-03                       |
| mmu-mir-132                  | CTGTTA      | immune response-activating signal transduction                        | 918                      | 108         | 20(3.19)                          | 3.47E-06                     | 2.27E-02                       |
| <i>KEGG Pathways</i>         |             |                                                                       |                          |             |                                   |                              |                                |
| mmu-mir-20a                  | CACTTT      | Cell cycle                                                            | 377                      | 108         | 33(3.27)                          | 2.50E-10                     | 4.94E-08                       |
| mmu-mir-19a                  | TTGCAC      | T cell receptor signaling pathway                                     | 306                      | 94          | 22(3.08)                          | 1.12E-06                     | 2.22E-04                       |
| mmu-mir-301                  | TGCACT      | Small cell lung cancer                                                | 355                      | 86          | 23(3.04)                          | 7.00E-07                     | 1.39E-04                       |
| mmu-mir-218                  | AGCACA      | T cell receptor signaling pathway                                     | 426                      | 94          | 30(3.02)                          | 1.02E-08                     | 2.02E-06                       |
| mmu-mir-301                  | TGCACT      | Pancreatic cancer                                                     | 355                      | 72          | 19(3)                             | 8.27E-06                     | 1.64E-03                       |
| mmu-mir-429                  | CAGTAT      | Small cell lung cancer                                                | 236                      | 86          | 15(2.98)                          | 1.07E-04                     | 2.12E-02                       |
| mmu-mir-449                  | CACTGC      | T cell receptor signaling pathway                                     | 342                      | 94          | 23(2.89)                          | 1.97E-06                     | 3.90E-04                       |
| mmu-mir-449                  | CACTGC      | B cell receptor signaling pathway                                     | 342                      | 66          | 16(2.86)                          | 8.39E-05                     | 1.66E-02                       |
| mmu-mir-218                  | AGCACA      | Glioma                                                                | 426                      | 63          | 19(2.86)                          | 1.41E-05                     | 2.79E-03                       |
| mmu-mir-32                   | GTGCAA      | Small cell lung cancer                                                | 264                      | 86          | 16(2.84)                          | 1.08E-04                     | 2.14E-02                       |

<sup>a</sup>The number in the parentheses is the fold-change enrichment. The fold-change enrichment is defined to be the observed overlap divided by the expected overlap.

<sup>b</sup>The nominal p-value represents the Fisher's exact test statistics while the corrected p-value represents the Bonferroni-corrected p-value (nominal p-value multiplied by the number of sets searched).
